# Supplementary material for: Development and validation of a preoperative prognostic index independent of TNM stage in resected non-small cell lung cancer
Source: Springer Nature journal article supplement (doi:10.1186/s12890-017-0529-9), 2017-12-01
Supplement: MOESM2 [file 15277294]

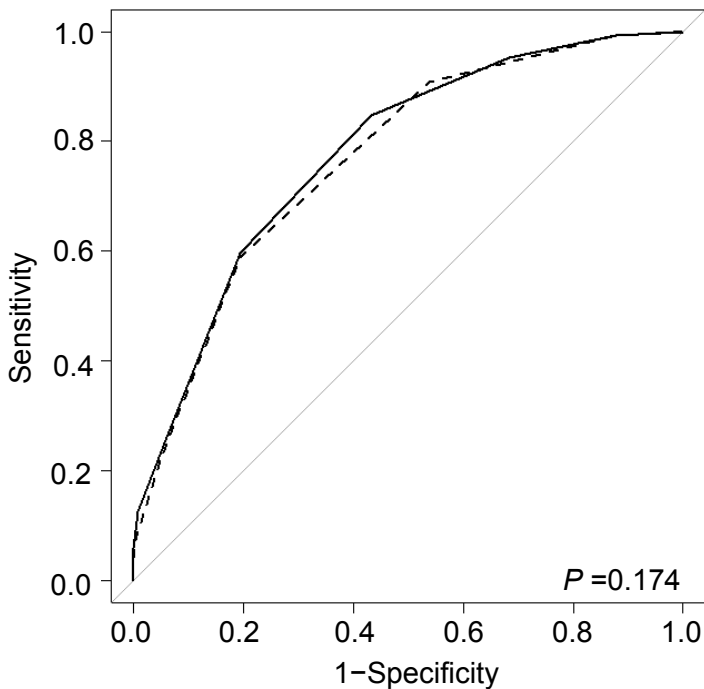

— Prognostic index 1, AUC: 0.78 (95% CI: 0.74-0.82)

- - - Prognostic index 2, AUC: 0.77 (95% CI: 0.73-0.81)
